# Supplementary material
Source: publisher figshare collection journal article supplement (https://aacr.figshare.com/articles/dataset/_/23905304)

**Supplemental Figure 14.** Genes with increased dependency in cell lines with gain(1q).

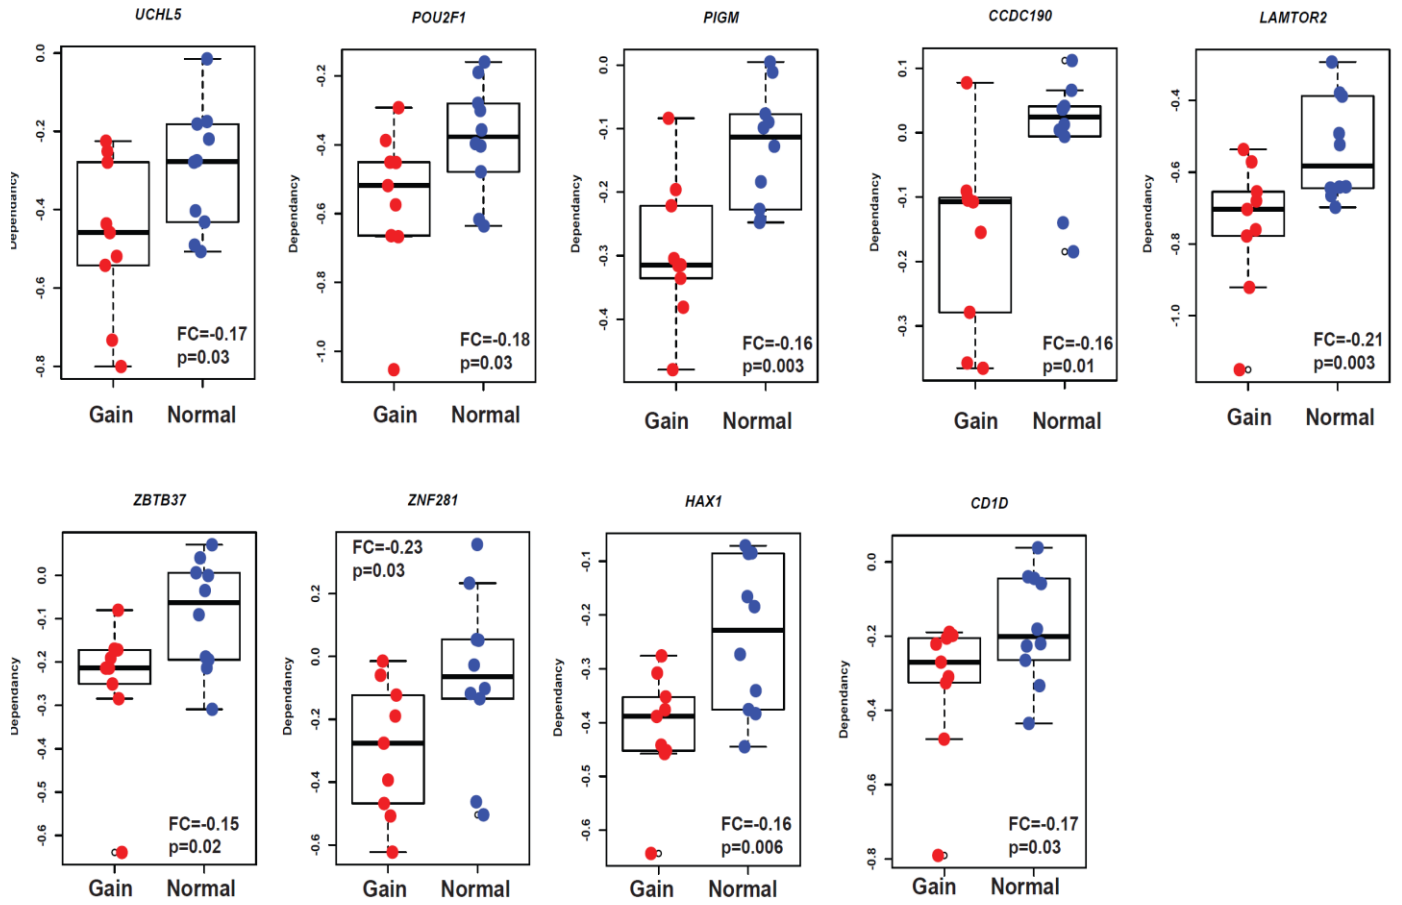

Supplement: Supplementary file 1 [file 41911490]
